# Supplementary material for: Altered Gray-White Matter Boundary Contrast in Toddlers at Risk for Autism Relates to Later Diagnosis of Autism Spectrum Disorder
Source: Front Neurosci. 2021 Jun 17;15:669194. doi: 10.3389/fnins.2021.669194 (PMC8248433; doi:10.3389/fnins.2021.669194)
Supplement: Supplementary Table 1 — Demographic and behavioral information on HR-ASD subgroups (LOA and EOA). P-value of statistical comparison between both subgroups. [file Table_1.XLSX]

## Sheet: Feuil2
	HR-ASD subgroups by age of first diagnosis
	late-onset ASD (n=5)	early-onset ASD (n=4)	p-value
Mean MRI age [months] (n = 20)	15.2 ± 0.4 (14.6 - 15.7)	16.6 ± 1.4 (15.3 - 18.3)	.191 (U)
Time interval between scans [months] (n = 20)	6.5 ± 0.5 (5.9 - 7.2)	6.1 ± 0.5 (5.6 - 6.5)	.266
Gender (female number) (n = 20)	0	1
Age at 1nd clinical assesment (n = 19)	18.4 ± 0.4 (17.7 - 19.1)	18 ± 0.1 (17.9 - 18.2)	.181
ADOS CSS (n = 19)	2.4 ± 1.1 (1 - 4)	7.8 ± 1.7 (6 - 10)	<.001
DQ (n = 19)	86.2 ± 5.1 (78.8 - 89.9)	73.2 ± 13.1 (54.1 - 83.2)	.078
Age at 3rd clinical assesment (n = 20)	36 ± 0.8 (34.9 - 36.8)	36.8 ± 1.2 (35.5 - 38.3)	.248
ADOS CSS (n = 20)	6.4 ± 1.5 (5 - 9)	6.25 ± 1.3 (5 - 8)	.879
DQ (n = 20)	77.6 ± 28.9 (32.5 - 103.2)	77.1 ± 6.1 (70.8 - 84.6)	.974 (U)
